# Supplementary material for: Characterisation of Early-Life Fecal Microbiota in Susceptible and Healthy Pigs to Post-Weaning Diarrhoea
Source: PLoS One. 2017 Jan 10;12(1):e0169851. doi: 10.1371/journal.pone.0169851 (PMC5225014; doi:10.1371/journal.pone.0169851)
Supplement: S3 Table — Assessment of performances of the first sPLS–DA classification model (S3.1, S3.2, S3.3 and S3.4 Table) and the second sPLS–DA classification model with the most stable OTUs from the first sPLS-DA (S3.5 and S3.6 Table). Diarrhoeic, D; H, healthy. (XLSX) [file pone.0169851.s007.xlsx]

## Sheet: 1.Feature stability comp1
S3.1. Table. Assessment of performances of the first sPLS –DA classification model
For each component , tuning sPLS-DA model provided the stability of feature across all cross validation iteration (from 0 for the less stable to 1 for the most stable feature).
Features (OTUs)	Stability of the Feature over all cross validation
1117593_p__Proteobacteria_g__Comamonas	1
134032_p__Firmicutes_g__Lactobacillus	1
145801_p__Firmicutes_g__	1
148067_p__Firmicutes_g__Blautia	1
15368_p__Firmicutes_g__Streptococcus	1
15432_p__Firmicutes_g__Streptococcus	1
176318_p__Firmicutes_g__	1
2203165_p__Firmicutes_g__Oscillospira	1
257909_p__Actinobacteria_g__Trueperella	1
2670715_p__Firmicutes_g__Clostridium	1
288265_p__Bacteroidetes_g__Prevotella	1
296023_p__Firmicutes_g__	1
299267_p__Proteobacteria_NA	1
302932_p__Firmicutes_g__	1
303990_p__Firmicutes_g__Clostridium	1
309030_p__Firmicutes_g__Clostridium	1
3117556_p__Bacteroidetes_g__Butyricimonas	1
334729_p__Bacteroidetes_g__Prevotella	1
3576174_p__Firmicutes_g__	1
368681_p__Bacteroidetes_g__Prevotella	1
3697034_p__Firmicutes_g__Enterococcus	1
3946926_p__Firmicutes_g__Lactobacillus	1
4212517_p__Firmicutes_g__	1
4295707_p__Firmicutes_g__[Eubacterium]	1
4310223_p__Bacteroidetes_g__	1
4316928_p__Firmicutes_g__Enterococcus	1
4352349_p__Firmicutes_g__Clostridium	1
4354477_p__Proteobacteria_g__	1
4355718_p__Actinobacteria_g__Actinomyces	1
4362942_p__Firmicutes_g__Enterococcus	1
4375889_p__Firmicutes_g__	1
4376828_p__Actinobacteria_g__Bifidobacterium	1
4377091_p__Bacteroidetes_g__Bacteroides	1
4387208_p__Firmicutes_g__Enterococcus	1
4393073_p__Firmicutes_g__	1
4414420_p__Bacteroidetes_g__Bacteroides	1
4426298_p__Actinobacteria_g__Bifidobacterium	1
4431558_p__Firmicutes_g__	1
4439398_p__Fusobacteria_g__Fusobacterium	1
4439469_p__Firmicutes_g__	1
4439530_p__Firmicutes_g__	1
4450214_p__Firmicutes_g__	1
4453060_p__Firmicutes_g__Enterococcus	1
4454025_p__Firmicutes_g__	1
4458227_p__Firmicutes_g__	1
4468466_p__Firmicutes_g__	1
4473664_p__Firmicutes_g__Peptostreptococcus	1
4475784_p__Firmicutes_g__Enterococcus	1
484444_p__Firmicutes_g__Lactobacillus	1
514363_p__Bacteroidetes_g__Parabacteroides	1
515590_p__Bacteroidetes_g__	1
524884_p__Firmicutes_g__[Eubacterium]	1
536754_p__Firmicutes_g__Lactobacillus	1
681370_p__Actinobacteria_g__Bifidobacterium	1
712971_p__Firmicutes_g__Lactobacillus	1
819507_p__Firmicutes_g__Lactobacillus	1
828676_p__Fusobacteria_g__Fusobacterium	1
847670_p__Firmicutes_g__Clostridium	1
New.ReferenceOTU153_p__Actinobacteria_g__Trueperella	1
New.ReferenceOTU158_p__Firmicutes_g__Clostridium	1
New.ReferenceOTU159_p__Actinobacteria_NA	1
New.ReferenceOTU213_p__Firmicutes_g__	1
New.ReferenceOTU4_p__Firmicutes_g__Dialister	1
1096610_p__Firmicutes_g__Finegoldia	0.8
1102370_p__Firmicutes_g__	0.8
128300_p__Firmicutes_g__Lactobacillus	0.8
146935_p__Firmicutes_g__Lactobacillus	0.8
147100_p__Firmicutes_g__	0.8
169031_p__Firmicutes_g__Phascolarctobacterium	0.8
176104_p__Firmicutes_g__Oscillospira	0.8
17652_p__Proteobacteria_g__Comamonas	0.8
177039_p__Firmicutes_g__	0.8
180082_p__Bacteroidetes_g__Parabacteroides	0.8
183439_p__Firmicutes_g__	0.8
235212_p__Firmicutes_g__	0.8
303320_p__Firmicutes_g__	0.8
3195723_p__Firmicutes_g__Oscillospira	0.8
3510697_p__Bacteroidetes_g__	0.8
3829957_p__Proteobacteria_g__	0.8
3878210_p__Firmicutes_g__Peptostreptococcus	0.8
4093791_p__Firmicutes_g__	0.8
4202174_p__Firmicutes_g__	0.8
4309760_p__Firmicutes_g__	0.8
4315100_p__Firmicutes_g__	0.8
4330813_p__Firmicutes_g__Lactobacillus	0.8
4367187_p__Firmicutes_g__	0.8
4374084_p__Bacteroidetes_g__Parabacteroides	0.8
4412540_p__Firmicutes_g__	0.8
4420408_p__Bacteroidetes_g__Bacteroides	0.8
4429301_p__Firmicutes_g__Blautia	0.8
4429335_p__Firmicutes_g__Peptoniphilus	0.8
4435664_p__Bacteroidetes_g__Bacteroides	0.8
4437359_p__Firmicutes_g__Oscillospira	0.8
4465473_p__Firmicutes_g__	0.8
4473975_p__Firmicutes_g__Enterococcus	0.8
4476186_p__Bacteroidetes_g__Prevotella	0.8
516457_p__Bacteroidetes_g__Prevotella	0.8
520657_p__Bacteroidetes_g__Prevotella	0.8
524842_p__Firmicutes_g__	0.8

## Sheet: 2.Feature stability comp2
S3.2. Table. Assessment of performances of the first sPLS –DA classification model
For each component , tuning sPLS-DA model provided the stability of feature across all cross validation iteration (from 0 for the less stable to 1 for the most stable feature).
Features (OTUs)	Stability of the Feature over all cross validation
908071_p__Bacteroidetes_g__	1
176705_p__Firmicutes_g__Phascolarctobacterium	0.4
4376230_p__Proteobacteria_g__Klebsiella	0.4
928433_p__Firmicutes_g__Peptoniphilus	0.4
131921_p__Firmicutes_g__Lactobacillus	0.2
183592_p__Firmicutes_g__	0.2
196462_p__Firmicutes_g__	0.2
2243510_p__Bacteroidetes_g__Bacteroides	0.2
2506486_p__Firmicutes_g__	0.2
2932557_p__Firmicutes_g__	0.2
305853_p__Firmicutes_g__	0.2
327209_p__Firmicutes_g__	0.2
334839_p__Firmicutes_g__	0.2
3540765_p__Firmicutes_g__	0.2
3550973_p__Firmicutes_g__	0.2
40149_p__Firmicutes_g__Oscillospira	0.2
4333731_p__Firmicutes_g__	0.2
4347520_p__Firmicutes_g__	0.2
4361768_p__Actinobacteria_g__	0.2
4367187_p__Firmicutes_g__	0.2
4369901_p__Bacteroidetes_g__CF231	0.2
4371061_p__Firmicutes_g__Coprococcus	0.2
4414725_p__Firmicutes_g__Blautia	0.2
4420408_p__Bacteroidetes_g__Bacteroides	0.2
4420669_p__Bacteroidetes_g__Butyricimonas	0.2
4437814_p__Bacteroidetes_g__Bacteroides	0.2
4441615_p__Firmicutes_g__	0.2
4447072_p__Bacteroidetes_g__Bacteroides	0.2
4456091_p__Fusobacteria_g__Fusobacterium	0.2
4461030_p__Proteobacteria_g__Klebsiella	0.2
4468384_p__Firmicutes_g__	0.2
4473977_p__Firmicutes_g__	0.2
4476780_p__Bacteroidetes_g__	0.2
50499_p__Firmicutes_g__	0.2
538247_p__Actinobacteria_g__	0.2
839964_p__Firmicutes_g__Oscillospira	0.2
New.CleanUp.ReferenceOTU102532_p__Firmicutes_g__	0.2
New.CleanUp.ReferenceOTU371_p__Proteobacteria_g__Aggregatibacter	0.2
New.CleanUp.ReferenceOTU44_NA_NA	0.2
New.CleanUp.ReferenceOTU48_p__Firmicutes_g__rc4-4	0.2
New.ReferenceOTU17_p__Firmicutes_g__Lactobacillus	0.2
New.ReferenceOTU28_p__Firmicutes_g__Oscillospira	0.2
New.ReferenceOTU44_p__Firmicutes_g__[Ruminococcus]	0.2

## Sheet: 3.Feature stability comp3
S3.3. Table. Assessment of performances of the first sPLS –DA classification model
For each component , tuning sPLS-DA model provided the stability of feature across all cross validation iteration (from 0 for the less stable to 1 for the most stable feature).
Features (OTUs)	Stability of the Feature over all cross validation
176705_p__Firmicutes_g__Phascolarctobacterium	0.4
177679_p__Bacteroidetes_g__	0.4
261590_p__Firmicutes_g__	0.4
290804_p__Actinobacteria_g__	0.4
4310221_p__Bacteroidetes_g__	0.4
4372578_p__Bacteroidetes_g__Bacteroides	0.4
4425495_p__Bacteroidetes_g__Bacteroides	0.4
129401_p__Firmicutes_g__Oscillospira	0.2
145856_p__Firmicutes_g__	0.2
148453_p__Firmicutes_g__Lactobacillus	0.2
176104_p__Firmicutes_g__Oscillospira	0.2
182643_p__Firmicutes_g__	0.2
20534_p__Bacteroidetes_g__[Prevotella]	0.2
2497335_p__Bacteroidetes_g__Parabacteroides	0.2
259212_p__Firmicutes_g__	0.2
294885_p__Firmicutes_g__Turicibacter	0.2
302932_p__Firmicutes_g__	0.2
321440_p__Firmicutes_g__	0.2
3422630_p__Firmicutes_g__	0.2
3472078_p__Bacteroidetes_g__Bacteroides	0.2
355745_p__Spirochaetes_g__Sphaerochaeta	0.2
3903651_p__Firmicutes_g__Oscillospira	0.2
4093791_p__Firmicutes_g__	0.2
4299547_p__Firmicutes_g__	0.2
4318315_p__Firmicutes_g__	0.2
4331364_p__Firmicutes_g__	0.2
4400427_p__Firmicutes_g__	0.2
4414725_p__Firmicutes_g__Blautia	0.2
4435575_p__Firmicutes_g__	0.2
4456091_p__Fusobacteria_g__Fusobacterium	0.2
4462432_p__Actinobacteria_g__Corynebacterium	0.2
4464065_p__Firmicutes_g__	0.2
4471854_p__Firmicutes_g__Coprococcus	0.2
4474380_p__Firmicutes_g__Blautia	0.2
4476950_p__Firmicutes_g__Anaerococcus	0.2
618906_p__Firmicutes_g__p-75-a5	0.2
849110_p__Firmicutes_g__Oscillospira	0.2
New.CleanUp.ReferenceOTU0_p__Firmicutes_g__Phascolarctobacterium	0.2
New.CleanUp.ReferenceOTU117669_p__Actinobacteria_g__Bifidobacterium	0.2
New.CleanUp.ReferenceOTU26_p__Firmicutes_g__	0.2
New.CleanUp.ReferenceOTU27_p__Bacteroidetes_g__Bacteroides	0.2
New.CleanUp.ReferenceOTU348_p__Firmicutes_g__Lactobacillus	0.2
New.ReferenceOTU8_p__Bacteroidetes_g__Bacteroides	0.2

## Sheet: 4.Error Rate 1
S3.4. Table. Assessment of performances of the first sPLS –DA classification model
Performance of classification using all features with stability values from 0.2 to 1.
	Distances
	Maximum	Centroids	Mahalanobis
ncomp 1	0.5	0.5	0.5
ncomp 2	0.6	0.5	0.6
ncomp 3	0.5	0.5	0.5
It is noticeable that the component 3 did not increase the performance of classification

## Sheet: 5.Error Rate 2
S3.5. Table. Assessment of performances of the second sPLS –DA classification model with the most stable OTUs from the first sPLS-DA (S2.1, S2.2 and S2.3 Table )
Classification performance using all features with stability values equal to 1
	Distances
	Maximum	Centroids	Mahalanobis
ncomp 1	0.2	0.2	0.2
ncomp 2	0.1115	0.1787	0.1115

## Sheet: 6.OTUs contribution
S3.6. Table. Assessment of performances of the second sPLS –DA classification model with the most stable OTUs from the first sPLS-DA (Table S2.1, S2.2 and S2.3)
					Taxonomy
OTUs ID (Only otus with stability 1 have been chosen)	Contribution importance to D group	Contribution importance to RE group	Contributor OTUs to RE or D groups*	Importance of contribution to the component 1	Kingdom	Phylum	Class	Order	Family	Genus	Species
134032	-0.986229	0.866288	RE	0.108932	k__Bacteria	p__Firmicutes	c__Bacilli	o__Lactobacillales	f__Lactobacillaceae	g__Lactobacillus	s__
176318	-1.26531	0.653221	RE	0.158526	k__Bacteria	p__Firmicutes	c__Clostridia	o__Clostridiales	f__Christensenellaceae	g__	s__
2203165	-0.684012	0.781181	RE	0.144431	k__Bacteria	p__Firmicutes	c__Clostridia	o__Clostridiales	f__Ruminococcaceae	g__Oscillospira	s__
288265	-0.755026	0.585222	RE	0.146518	k__Bacteria	p__Bacteroidetes	c__Bacteroidia	o__Bacteroidales	f__Prevotellaceae	g__Prevotella	s__
296023	-0.674548	1.08291	RE	0.1185	k__Bacteria	p__Firmicutes	c__Clostridia	o__Clostridiales	f__Ruminococcaceae	g__	s__
302932	-1.24006	0.288013	RE	0.130601	k__Bacteria	p__Firmicutes	c__Clostridia	o__Clostridiales	f__	g__	s__
3117556	-0.376027	0.543391	RE	0.103589	k__Bacteria	p__Bacteroidetes	c__Bacteroidia	o__Bacteroidales	f__[Odoribacteraceae]	g__Butyricimonas	s__
334729	-0.597615	0.674023	RE	0.130458	k__Bacteria	p__Bacteroidetes	c__Bacteroidia	o__Bacteroidales	f__Prevotellaceae	g__Prevotella	s__stercorea
368681	-0.983921	0.573243	RE	0.165891	k__Bacteria	p__Bacteroidetes	c__Bacteroidia	o__Bacteroidales	f__Prevotellaceae	g__Prevotella	s__stercorea
3946926	-0.795105	1.02866	RE	0.120976	k__Bacteria	p__Firmicutes	c__Bacilli	o__Lactobacillales	f__Lactobacillaceae	g__Lactobacillus	s__
4212517	-0.640525	0.846807	RE	0.134387	k__Bacteria	p__Firmicutes	c__Clostridia	o__Clostridiales	f__Lachnospiraceae	g__	s__
4375889	-1.30827	0.565364	RE	0.146118	k__Bacteria	p__Firmicutes	c__Clostridia	o__Clostridiales	f__Ruminococcaceae	g__	s__
4377091	-0.66848	0.779763	RE	0.14103	k__Bacteria	p__Bacteroidetes	c__Bacteroidia	o__Bacteroidales	f__Bacteroidaceae	g__Bacteroides	s__fragilis
4393073	-0.958922	0.641569	RE	0.128225	k__Bacteria	p__Firmicutes	c__Clostridia	o__Clostridiales	f__Lachnospiraceae	g__	s__
4431558	-0.79832	0.76086	RE	0.14713	k__Bacteria	p__Firmicutes	c__Clostridia	o__Clostridiales	f__Lachnospiraceae	g__	s__
4439469	-0.766662	0.852353	RE	0.14427	k__Bacteria	p__Firmicutes	c__Clostridia	o__Clostridiales	f__Ruminococcaceae	g__	s__
4450214	-0.00987367	0.702807	RE	0.124153	k__Bacteria	p__Firmicutes	c__Clostridia	o__Clostridiales	f__Ruminococcaceae	g__	s__
4454025	-0.861003	0.974347	RE	0.144493	k__Bacteria	p__Firmicutes	c__Clostridia	o__Clostridiales	f__Lachnospiraceae	g__	s__
4458227	-0.767558	0.915667	RE	0.166933	k__Bacteria	p__Firmicutes	c__Clostridia	o__Clostridiales	f__	g__	s__
4468466	-0.190507	0.441024	RE	0.133641	k__Bacteria	p__Firmicutes	c__Clostridia	o__Clostridiales	f__Ruminococcaceae	g__	s__
484444	-0.950532	0.708448	RE	0.117256	k__Bacteria	p__Firmicutes	c__Bacilli	o__Lactobacillales	f__Lactobacillaceae	g__Lactobacillus	s__
515590	-0.300252	0.527067	RE	0.136226	k__Bacteria	p__Bacteroidetes	c__Bacteroidia	o__Bacteroidales	f__	g__	s__
536754	-1.33394	0.701111	RE	0.134988	k__Bacteria	p__Firmicutes	c__Bacilli	o__Lactobacillales	f__Lactobacillaceae	g__Lactobacillus	s__reuteri
712971	0.094345	0.729199	RE	0.127499	k__Bacteria	p__Firmicutes	c__Bacilli	o__Lactobacillales	f__Lactobacillaceae	g__Lactobacillus	s__
819507	-1.20751	0.628861	RE	0.135716	k__Bacteria	p__Firmicutes	c__Bacilli	o__Lactobacillales	f__Lactobacillaceae	g__Lactobacillus	s__
908071	-0.5966	-0.160203	RE	0.121059	k__Bacteria	p__Bacteroidetes	c__Bacteroidia	o__Bacteroidales	f__	g__	s__
New.ReferenceOTU213	-0.0041668	0.582294	RE	0.130143	k__Bacteria	p__Firmicutes	c__Clostridia	o__Clostridiales	f__Lachnospiraceae	g__	s__
New.ReferenceOTU4	0.051819	0.140006	RE	0.0150596	k__Bacteria	p__Firmicutes	c__Clostridia	o__Clostridiales	f__Veillonellaceae	g__Dialister	s__
1117593	-0.338103	-0.442204	D	-0.100684	k__Bacteria	p__Proteobacteria	c__Betaproteobacteria	o__Burkholderiales	f__Comamonadaceae	g__Comamonas	s__
145801	0.625323	-0.613288	D	-0.125237	k__Bacteria	p__Firmicutes	c__Erysipelotrichi	o__Erysipelotrichales	f__Erysipelotrichaceae	g__	s__
148067	-0.0414399	-0.317844	D	-0.0728112	k__Bacteria	p__Firmicutes	c__Clostridia	o__Clostridiales	f__Lachnospiraceae	g__Blautia	s__
15368	0.67484	-0.674691	D	-0.118539	k__Bacteria	p__Firmicutes	c__Bacilli	o__Lactobacillales	f__Streptococcaceae	g__Streptococcus	s__
15432	0.613296	-0.267945	D	-0.119494	k__Bacteria	p__Firmicutes	c__Bacilli	o__Lactobacillales	f__Streptococcaceae	g__Streptococcus	s__
257909	0.203706	-0.15384	D	-0.103289	k__Bacteria	p__Actinobacteria	c__Actinobacteria	o__Actinomycetales	f__Actinomycetaceae	g__Trueperella	s__
2670715	0.596835	-0.185167	D	-0.114981	k__Bacteria	p__Firmicutes	c__Clostridia	o__Clostridiales	f__Clostridiaceae	g__Clostridium	s__
299267	0.719697	-1.24481	D	-0.151333	k__Bacteria	p__Proteobacteria	c__Gammaproteobacteria	o__Enterobacteriales	f__Enterobacteriaceae	NA	NA
303990	0.612951	-0.419785	D	-0.11959	k__Bacteria	p__Firmicutes	c__Clostridia	o__Clostridiales	f__Clostridiaceae	g__Clostridium	NA
309030	0.96852	-0.388619	D	-0.104466	k__Bacteria	p__Firmicutes	c__Clostridia	o__Clostridiales	f__Clostridiaceae	g__Clostridium	s__
3576174	0.839034	0.0289684	D	-0.125828	k__Bacteria	p__Firmicutes	c__Clostridia	o__Clostridiales	f__Clostridiaceae	g__	s__
3697034	0.480922	-0.14684	D	-0.129738	k__Bacteria	p__Firmicutes	c__Bacilli	o__Lactobacillales	f__Enterococcaceae	g__Enterococcus	s__
4295707	0.766012	-0.586169	D	-0.133397	k__Bacteria	p__Firmicutes	c__Erysipelotrichi	o__Erysipelotrichales	f__Erysipelotrichaceae	g__[Eubacterium]	s__biforme
4310223	-0.0414399	-0.317844	D	-0.0728112	k__Bacteria	p__Bacteroidetes	c__Bacteroidia	o__Bacteroidales	f__	g__	s__
4316928	0.647585	-1.23059	D	-0.126714	k__Bacteria	p__Firmicutes	c__Bacilli	o__Lactobacillales	f__Enterococcaceae	g__Enterococcus	NA
4352349	0.95158	-0.956462	D	-0.156126	k__Bacteria	p__Firmicutes	c__Clostridia	o__Clostridiales	f__Clostridiaceae	g__Clostridium	s__
4354477	0.445345	-0.55479	D	-0.116364	k__Bacteria	p__Proteobacteria	c__Gammaproteobacteria	o__Enterobacteriales	f__Enterobacteriaceae	g__	s__
4355718	0.417015	-0.451549	D	-0.0819726	k__Bacteria	p__Actinobacteria	c__Actinobacteria	o__Actinomycetales	f__Actinomycetaceae	g__Actinomyces	s__
4362942	0.42383	-0.0339978	D	-0.12059	k__Bacteria	p__Firmicutes	c__Bacilli	o__Lactobacillales	f__Enterococcaceae	g__Enterococcus	s__
4376828	0.275415	-0.0155353	D	-0.0976323	k__Bacteria	p__Actinobacteria	c__Actinobacteria	o__Bifidobacteriales	f__Bifidobacteriaceae	g__Bifidobacterium	s__pseudolongum
4387208	0.601567	-1.29229	D	-0.136488	k__Bacteria	p__Firmicutes	c__Bacilli	o__Lactobacillales	f__Enterococcaceae	g__Enterococcus	s__
4414420	1.24395	-0.57914	D	-0.131755	k__Bacteria	p__Bacteroidetes	c__Bacteroidia	o__Bacteroidales	f__Bacteroidaceae	g__Bacteroides	s__eggerthii
4426298	0.0980231	-0.53085	D	-0.0934695	k__Bacteria	p__Actinobacteria	c__Actinobacteria	o__Bifidobacteriales	f__Bifidobacteriaceae	g__Bifidobacterium	s__pseudolongum
4439398	0.684089	-0.239824	D	-0.115667	k__Bacteria	p__Fusobacteria	c__Fusobacteriia	o__Fusobacteriales	f__Fusobacteriaceae	g__Fusobacterium	s__
4439530	0.738407	0.00454307	D	-0.114025	k__Bacteria	p__Firmicutes	c__Clostridia	o__Clostridiales	f__Clostridiaceae	g__	s__
4453060	0.732636	-1.24802	D	-0.120229	k__Bacteria	p__Firmicutes	c__Bacilli	o__Lactobacillales	f__Enterococcaceae	g__Enterococcus	s__
4473664	0.457867	-0.36657	D	-0.0961449	k__Bacteria	p__Firmicutes	c__Clostridia	o__Clostridiales	f__Peptostreptococcaceae	g__Peptostreptococcus	s__
4475784	0.350853	-0.190294	D	-0.11416	k__Bacteria	p__Firmicutes	c__Bacilli	o__Lactobacillales	f__Enterococcaceae	g__Enterococcus	s__
514363	-0.0414399	-0.317844	D	-0.0728112	k__Bacteria	p__Bacteroidetes	c__Bacteroidia	o__Bacteroidales	f__Porphyromonadaceae	g__Parabacteroides	s__
524884	0.861366	-0.597531	D	-0.136042	k__Bacteria	p__Firmicutes	c__Erysipelotrichi	o__Erysipelotrichales	f__Erysipelotrichaceae	g__[Eubacterium]	s__biforme
681370	0.239538	-0.0367797	D	-0.105514	k__Bacteria	p__Actinobacteria	c__Actinobacteria	o__Bifidobacteriales	f__Bifidobacteriaceae	g__Bifidobacterium	s__pseudolongum
828676	0.782526	-0.766801	D	-0.141516	k__Bacteria	p__Fusobacteria	c__Fusobacteriia	o__Fusobacteriales	f__Fusobacteriaceae	g__Fusobacterium	s__
847670	0.361464	-0.18991	D	-0.127521	k__Bacteria	p__Firmicutes	c__Clostridia	o__Clostridiales	f__Clostridiaceae	g__Clostridium	NA
New.ReferenceOTU153	0.346387	-1.18317	D	-0.137815	k__Bacteria	p__Actinobacteria	c__Actinobacteria	o__Actinomycetales	f__Actinomycetaceae	g__Trueperella	s__
New.ReferenceOTU158	0.901609	-0.387528	D	-0.1251	k__Bacteria	p__Firmicutes	c__Clostridia	o__Clostridiales	f__Clostridiaceae	g__Clostridium	NA
New.ReferenceOTU159	0.603402	-0.568619	D	-0.129351	k__Bacteria	p__Actinobacteria	c__Actinobacteria	o__Actinomycetales	f__Actinomycetaceae	NA	NA
			*, the more an OTU contributed to a group, the higher its abundance was compared to the other group
