# Supplementary material for: Characterisation of Early-Life Fecal Microbiota in Susceptible and Healthy Pigs to Post-Weaning Diarrhoea
Source: PLoS One. 2017 Jan 10;12(1):e0169851. doi: 10.1371/journal.pone.0169851 (PMC5225014; doi:10.1371/journal.pone.0169851)
Supplement: S8 Table — The corresponding heatmap is presented in Fig 8. (XLSX) [file pone.0169851.s012.xlsx]

## Sheet: S8 Table
S8 Table. Values of sPLS regression analysis between the abundance of Bacteroidetes at PND 30 and PND 38 and Enterobacteria at PND30, and the discriminant OTUs at PND 7.
OTU	Kingdom	Phylum	Classe	Order	Familly	Genus	Species	Bacteroidetes.D38	Bacteroidetes.D30	Genus	D contribution	RE contribution	D contribution	RE contribution	Group contributor	Importance of contribution
1117593	k__Bacteria	p__Proteobacteria	c__Betaproteobacteria	o__Burkholderiales	f__Comamonadaceae	g__Comamonas	s__			Comamonas	-0,338102917	-0,442203793	TRUE	FALSE	D	-0.100684
134032	k__Bacteria	p__Firmicutes	c__Bacilli	o__Lactobacillales	f__Lactobacillaceae	g__Lactobacillus	s__	Red		Lactobacillus	-0,986228946	0,866288305	FALSE	TRUE	RE	0.108932
145801	k__Bacteria	p__Firmicutes	c__Erysipelotrichi	o__Erysipelotrichales	f__Erysipelotrichaceae	g__	s__				0,625322621	-0,613287662	TRUE	FALSE	D	-0.125237
148067	k__Bacteria	p__Firmicutes	c__Clostridia	o__Clostridiales	f__Lachnospiraceae	g__Blautia	s__			Blautia	-0,041439864	-0,317844073	TRUE	FALSE	D	-0.0728112
15368	k__Bacteria	p__Firmicutes	c__Bacilli	o__Lactobacillales	f__Streptococcaceae	g__Streptococcus	s__			Streptococcus	0,674839778	-0,674691499	TRUE	FALSE	D	-0.118539
15432	k__Bacteria	p__Firmicutes	c__Bacilli	o__Lactobacillales	f__Streptococcaceae	g__Streptococcus	s__			Streptococcus	0,613296294	-0,26794478	TRUE	FALSE	D	-0.119494
176318	k__Bacteria	p__Firmicutes	c__Clostridia	o__Clostridiales	f__Christensenellaceae	g__	s__	Red			-1,26531105	0,653220634	FALSE	TRUE	RE	0.158526
2203165	k__Bacteria	p__Firmicutes	c__Clostridia	o__Clostridiales	f__Ruminococcaceae	g__Oscillospira	s__			Oscillospira	-0,684012263	0,781180886	FALSE	TRUE	RE	0.144431
257909	k__Bacteria	p__Actinobacteria	c__Actinobacteria	o__Actinomycetales	f__Actinomycetaceae	g__Trueperella	s__			Trueperella	0,203705556	-0,153839636	TRUE	FALSE	D	-0.103289
2670715	k__Bacteria	p__Firmicutes	c__Clostridia	o__Clostridiales	f__Clostridiaceae	g__Clostridium	s__	Green		Clostridium	0,596835383	-0,185166657	TRUE	FALSE	D	-0.114981
288265	k__Bacteria	p__Bacteroidetes	c__Bacteroidia	o__Bacteroidales	f__Prevotellaceae	g__Prevotella	s__	Red		Prevotella	-0,755025638	0,585221981	FALSE	TRUE	RE	0.146518
296023	k__Bacteria	p__Firmicutes	c__Clostridia	o__Clostridiales	f__Ruminococcaceae	g__	s__				-0,67454821	1,082914522	FALSE	TRUE	RE	0.1185
299267	k__Bacteria	p__Proteobacteria	c__Gammaproteobacteria	o__Enterobacteriales	f__Enterobacteriaceae	NA	NA				0,719696797	-1,244813855	TRUE	FALSE	D	-0.151333
302932	k__Bacteria	p__Firmicutes	c__Clostridia	o__Clostridiales	f__	g__	s__	Red	Red		-1,240064778	0,2880134	FALSE	TRUE	RE	0.130601
303990	k__Bacteria	p__Firmicutes	c__Clostridia	o__Clostridiales	f__Clostridiaceae	g__Clostridium	NA	Green	Green	Clostridium	0,612950967	-0,419785347	TRUE	FALSE	D	-0.11959
309030	k__Bacteria	p__Firmicutes	c__Clostridia	o__Clostridiales	f__Clostridiaceae	g__Clostridium	s__	Green	Green	Clostridium	0,968519947	-0,38861937	TRUE	FALSE	D	-0.104466
3117556	k__Bacteria	p__Bacteroidetes	c__Bacteroidia	o__Bacteroidales	f__[Odoribacteraceae]	g__Butyricimonas	s__		Red	Butyricimonas	-0,376026551	0,543390968	FALSE	TRUE	RE	0.103589
334729	k__Bacteria	p__Bacteroidetes	c__Bacteroidia	o__Bacteroidales	f__Prevotellaceae	g__Prevotella	s__stercorea	Red		Prevotella	-0,597615102	0,674022816	FALSE	TRUE	RE	0.130458
3576174	k__Bacteria	p__Firmicutes	c__Clostridia	o__Clostridiales	f__Clostridiaceae	g__	s__				0,839033737	0,02896837	TRUE	FALSE	D	-0.125828
368681	k__Bacteria	p__Bacteroidetes	c__Bacteroidia	o__Bacteroidales	f__Prevotellaceae	g__Prevotella	s__stercorea	Red		Prevotella	-0,983920666	0,573243187	FALSE	TRUE	RE	0.165891
3697034	k__Bacteria	p__Firmicutes	c__Bacilli	o__Lactobacillales	f__Enterococcaceae	g__Enterococcus	s__		Green	Enterococcus	0,480921666	-0,146840335	TRUE	FALSE	D	-0.129738
3946926	k__Bacteria	p__Firmicutes	c__Bacilli	o__Lactobacillales	f__Lactobacillaceae	g__Lactobacillus	s__	Red		Lactobacillus	-0,795104942	1,028656137	FALSE	TRUE	RE	0.120976
4212517	k__Bacteria	p__Firmicutes	c__Clostridia	o__Clostridiales	f__Lachnospiraceae	g__	s__	Red	Red		-0,640524691	0,846806806	FALSE	TRUE	RE	0.134387
4295707	k__Bacteria	p__Firmicutes	c__Erysipelotrichi	o__Erysipelotrichales	f__Erysipelotrichaceae	g__[Eubacterium]	s__biforme		Green	[Eubacterium]	0,766012359	-0,586168785	TRUE	FALSE	D	-0.133397
4310223	k__Bacteria	p__Bacteroidetes	c__Bacteroidia	o__Bacteroidales	f__	g__	s__				-0,041439864	-0,317844073	TRUE	FALSE	D	-0.0728112
4316928	k__Bacteria	p__Firmicutes	c__Bacilli	o__Lactobacillales	f__Enterococcaceae	g__Enterococcus	NA		Green	Enterococcus	0,647585087	-1,230588789	TRUE	FALSE	D	-0.126714
4352349	k__Bacteria	p__Firmicutes	c__Clostridia	o__Clostridiales	f__Clostridiaceae	g__Clostridium	s__	Green		Clostridium	0,951579502	-0,956462494	TRUE	FALSE	D	-0.156126
4354477	k__Bacteria	p__Proteobacteria	c__Gammaproteobacteria	o__Enterobacteriales	f__Enterobacteriaceae	g__	s__				0,445344633	-0,554789922	TRUE	FALSE	D	-0.116364
4355718	k__Bacteria	p__Actinobacteria	c__Actinobacteria	o__Actinomycetales	f__Actinomycetaceae	g__Actinomyces	s__			Actinomyces	0,41701536	-0,451549365	TRUE	FALSE	D	-0.0819726
4362942	k__Bacteria	p__Firmicutes	c__Bacilli	o__Lactobacillales	f__Enterococcaceae	g__Enterococcus	s__		Green	Enterococcus	0,423829825	-0,033997827	TRUE	FALSE	D	-0.12059
4375889	k__Bacteria	p__Firmicutes	c__Clostridia	o__Clostridiales	f__Ruminococcaceae	g__	s__				-1,308272257	0,565363656	FALSE	TRUE	RE	0.146118
4376828	k__Bacteria	p__Actinobacteria	c__Actinobacteria	o__Bifidobacteriales	f__Bifidobacteriaceae	g__Bifidobacterium	s__pseudolongum			Bifidobacterium	0,275415193	-0,015535292	TRUE	FALSE	D	-0.0976323
4377091	k__Bacteria	p__Bacteroidetes	c__Bacteroidia	o__Bacteroidales	f__Bacteroidaceae	g__Bacteroides	s__fragilis	Red		Bacteroides	-0,668479921	0,779762553	FALSE	TRUE	RE	0.14103
4387208	k__Bacteria	p__Firmicutes	c__Bacilli	o__Lactobacillales	f__Enterococcaceae	g__Enterococcus	s__		Green	Enterococcus	0,60156723	-1,292291266	TRUE	FALSE	D	-0.136488
4393073	k__Bacteria	p__Firmicutes	c__Clostridia	o__Clostridiales	f__Lachnospiraceae	g__	s__	Red			-0,958921557	0,641569403	FALSE	TRUE	RE	0.128225
4414420	k__Bacteria	p__Bacteroidetes	c__Bacteroidia	o__Bacteroidales	f__Bacteroidaceae	g__Bacteroides	s__eggerthii			Bacteroides	1,243954449	-0,579139815	TRUE	FALSE	D	-0.131755
4426298	k__Bacteria	p__Actinobacteria	c__Actinobacteria	o__Bifidobacteriales	f__Bifidobacteriaceae	g__Bifidobacterium	s__pseudolongum			Bifidobacterium	0,09802312	-0,530850435	TRUE	FALSE	D	-0.0934695
4431558	k__Bacteria	p__Firmicutes	c__Clostridia	o__Clostridiales	f__Lachnospiraceae	g__	s__	Red			-0,798320019	0,760860407	FALSE	TRUE	RE	0.14713
4439398	k__Bacteria	p__Fusobacteria	c__Fusobacteriia	o__Fusobacteriales	f__Fusobacteriaceae	g__Fusobacterium	s__		Green	Fusobacterium	0,684089066	-0,239824052	TRUE	FALSE	D	-0.115667
4439469	k__Bacteria	p__Firmicutes	c__Clostridia	o__Clostridiales	f__Ruminococcaceae	g__	s__	Red			-0,766662276	0,852353139	FALSE	TRUE	RE	0.14427
4439530	k__Bacteria	p__Firmicutes	c__Clostridia	o__Clostridiales	f__Clostridiaceae	g__	s__				0,73840663	0,004543068	TRUE	FALSE	D	-0.114025
4450214	k__Bacteria	p__Firmicutes	c__Clostridia	o__Clostridiales	f__Ruminococcaceae	g__	s__				-0,009873674	0,702806952	FALSE	TRUE	RE	0.124153
4453060	k__Bacteria	p__Firmicutes	c__Bacilli	o__Lactobacillales	f__Enterococcaceae	g__Enterococcus	s__		Green	Enterococcus	0,73263633	-1,248022067	TRUE	FALSE	D	-0.120229
4454025	k__Bacteria	p__Firmicutes	c__Clostridia	o__Clostridiales	f__Lachnospiraceae	g__	s__				-0,861003064	0,974346733	FALSE	TRUE	RE	0.144493
4458227	k__Bacteria	p__Firmicutes	c__Clostridia	o__Clostridiales	f__	g__	s__				-0,767558246	0,915666712	FALSE	TRUE	RE	0.166933
4468466	k__Bacteria	p__Firmicutes	c__Clostridia	o__Clostridiales	f__Ruminococcaceae	g__	s__	Red			-0,190507174	0,441023591	FALSE	TRUE	RE	0.133641
4473664	k__Bacteria	p__Firmicutes	c__Clostridia	o__Clostridiales	f__Peptostreptococcaceae	g__Peptostreptococcus	s__	Green		Peptostreptococcus	0,45786726	-0,366570088	TRUE	FALSE	D	-0.0961449
4475784	k__Bacteria	p__Firmicutes	c__Bacilli	o__Lactobacillales	f__Enterococcaceae	g__Enterococcus	s__		Green	Enterococcus	0,350852812	-0,190294344	TRUE	FALSE	D	-0.11416
484444	k__Bacteria	p__Firmicutes	c__Bacilli	o__Lactobacillales	f__Lactobacillaceae	g__Lactobacillus	s__	Red		Lactobacillus	-0,950531901	0,708447777	FALSE	TRUE	RE	0.117256
514363	k__Bacteria	p__Bacteroidetes	c__Bacteroidia	o__Bacteroidales	f__Porphyromonadaceae	g__Parabacteroides	s__			Parabacteroides	-0,041439864	-0,317844073	TRUE	FALSE	D	-0.0728112
515590	k__Bacteria	p__Bacteroidetes	c__Bacteroidia	o__Bacteroidales	f__	g__	s__	Red			-0,300251951	0,527067094	FALSE	TRUE	RE	0.136226
524884	k__Bacteria	p__Firmicutes	c__Erysipelotrichi	o__Erysipelotrichales	f__Erysipelotrichaceae	g__[Eubacterium]	s__biforme			[Eubacterium]	0,861366044	-0,597530521	TRUE	FALSE	D	-0.136042
536754	k__Bacteria	p__Firmicutes	c__Bacilli	o__Lactobacillales	f__Lactobacillaceae	g__Lactobacillus	s__reuteri	Red	Red	Lactobacillus	-1,333935333	0,701110659	FALSE	TRUE	RE	0.134988
681370	k__Bacteria	p__Actinobacteria	c__Actinobacteria	o__Bifidobacteriales	f__Bifidobacteriaceae	g__Bifidobacterium	s__pseudolongum			Bifidobacterium	0,239538438	-0,036779686	TRUE	FALSE	D	-0.105514
712971	k__Bacteria	p__Firmicutes	c__Bacilli	o__Lactobacillales	f__Lactobacillaceae	g__Lactobacillus	s__			Lactobacillus	0,094345008	0,729198807	FALSE	TRUE	RE	0.127499
819507	k__Bacteria	p__Firmicutes	c__Bacilli	o__Lactobacillales	f__Lactobacillaceae	g__Lactobacillus	s__			Lactobacillus	-1,207512659	0,628860678	FALSE	TRUE	RE	0.135716
828676	k__Bacteria	p__Fusobacteria	c__Fusobacteriia	o__Fusobacteriales	f__Fusobacteriaceae	g__Fusobacterium	s__			Fusobacterium	0,782526155	-0,766800597	TRUE	FALSE	D	-0.141516
847670	k__Bacteria	p__Firmicutes	c__Clostridia	o__Clostridiales	f__Clostridiaceae	g__Clostridium	NA			Clostridium	0,36146411	-0,189909775	TRUE	FALSE	D	-0.127521
New.ReferenceOTU153	k__Bacteria	p__Actinobacteria	c__Actinobacteria	o__Actinomycetales	f__Actinomycetaceae	g__Trueperella	s__			Trueperella	0,346387165	-1,183174411	TRUE	FALSE	D	-0.137815
New.ReferenceOTU158	k__Bacteria	p__Firmicutes	c__Clostridia	o__Clostridiales	f__Clostridiaceae	g__Clostridium	NA		Green	Clostridium	0,901608823	-0,387527766	TRUE	FALSE	D	-0.1251
New.ReferenceOTU159	k__Bacteria	p__Actinobacteria	c__Actinobacteria	o__Actinomycetales	f__Actinomycetaceae	NA	NA				0,603402355	-0,568619369	TRUE	FALSE	D	-0.129351
New.ReferenceOTU213	k__Bacteria	p__Firmicutes	c__Clostridia	o__Clostridiales	f__Lachnospiraceae	g__	s__				-0,004166795	0,582293575	FALSE	TRUE	RE	0.130143
New.ReferenceOTU4	k__Bacteria	p__Firmicutes	c__Clostridia	o__Clostridiales	f__Veillonellaceae	g__Dialister	s__			Dialister	0,051819017	0,140005774	FALSE	TRUE	RE	0.0150596
908071	k__Bacteria	p__Bacteroidetes	c__Bacteroidia	o__Bacteroidales	f__	g__	s__				-0,596600189	-0,160202656	FALSE	TRUE	RE	0.121059
